# Supplementary material for: Household preferences for reducing greenhouse gas emissions in four European high-income countries: Does health information matter? A mixed-methods study protocol
Source: PubMed Central journal article supplement (PMC5540303; doi:10.1186/s12889-017-4604-1), 2017-08-01
Supplement: 12889_2017_4604_MOESM1_ESM.pdf [file 12889_2017_4604_MOESM1_ESM.pdf]

## Appendix. List of variables collected in HOPE.

| N  | Category name                 | Number of variables | Description                                                                            |
|----|-------------------------------|---------------------|----------------------------------------------------------------------------------------|
| 0  | Interview                     | 2                   | Interview information                                                                  |
| 1  | Household data                | 458                 | HH data from Int1                                                                      |
| 2  | Emission data                 | 17                  | Computed CO2 emission data based on Int1 data                                          |
| 3  | Cost data                     | 2                   | Computed costs based on Int1 data                                                      |
| 4  | Likert ratings                | 65                  | Int2: rating of the 65 mitigation measures on a 5-point Likert scale                   |
| 5  | Ranking                       | 136                 | Int2: ranking of mitigation measures                                                   |
| 6  | Timestamp                     | 60                  | Int2: time stamp marking the selection of a mitigation measure (non-functional)        |
| 7  | Already done actions          | 66                  | Action already done by household before survey                                         |
| 8  | CO2 DATA (maximum potential)  | 70                  | Int2: Computed maximum potential of CO2 emission reduction (based on all 65 actions)   |
| 9  | CO2 DATA when applicable      | 70                  | Int2: Computed maximum applicable CO2 emission reduction (based on applicable actions) |
| 10 | CO2 DATA Reduction Sim1       | 70                  | Int2: Computed CO2 emission reduction after simulation 1                               |
| 11 | CO2 DATA Reduction Sim2       | 70                  | Int2: Computed CO2 emission reduction after simulation 2                               |
| 12 | Cost DATA (maximum potential) | 70                  | Int2: Computed maximum potential of cost change (based on all 65 actions)              |
| 13 | Cost DATA when applicable     | 70                  | Int2: Computed applicable cost change (based on applicable actions)                    |
| 14 | Cost DATA Reduction Sim1      | 70                  | Int2: Computed cost reduction after simulation 1                                       |
| 15 | Cost DATA Reduction Sim2      | 70                  | Int2: Computed cost reduction after simulation 2                                       |
| 16 | Questionnaire: Interviewer    | 16                  | Feedback from interviewer after Int2                                                   |
| 17 | Questionnaire: Participant    | 15                  | Feedback from participant after Int2                                                   |
| 18 | TOOL VERSION                  | 2                   | Excel tool version                                                                     |
|    | <b>Total</b>                  | <b>1399</b>         |                                                                                        |

**Please note.** Int1 = Interaction 1 - Online questionnaire; Int2 = Interaction 2 - On-site simulation.
